# Supplementary material
Source: PubMed Central journal article supplement (PMC3316659)
Supplement: supp_111.137026_137026SI.pdf [file supp_111.137026_137026SI.pdf]

### Supporting Files

Files S1-S6 are available for download at .

File S1 – Genotypic data.

File S2 – Pedigree data.

File S3 – Breeding values.

File S4 – Deregressed phenotypes.

File S5 – Random Regression Best Linear Unbiased Predictor (RR-BLUP) R script.

File S6 – Bayes A and Bayes C $\pi$  R script.

**Table S1 Predictive ability ( $r_{\hat{y}y}$ ) and standard error (SE) of RR-BLUP model under two different cross validation schemes: 10-fold cross validation and leave one-out (L1-Out)**

| Trait Category     | Trait         | Methods                  |              |                         |             |
|--------------------|---------------|--------------------------|--------------|-------------------------|-------------|
|                    |               | $r_{\hat{y}y}$ - 10-Fold | SE - 10-Fold | $r_{\hat{y}y}$ - L1-Out | SE - L1-Out |
| Growth             | HT            | 0.39                     | 0.029        | 0.38                    | 0.029       |
|                    | HTLC          | 0.45                     | 0.027        | 0.46                    | 0.027       |
|                    | BHLC          | 0.49                     | 0.026        | 0.49                    | 0.026       |
|                    | DBH           | 0.46                     | 0.027        | 0.46                    | 0.027       |
| Development        | CWAL          | 0.48                     | 0.029        | 0.48                    | 0.030       |
|                    | CWAC          | 0.38                     | 0.026        | 0.40                    | 0.027       |
|                    | BD            | 0.27                     | 0.032        | 0.27                    | 0.032       |
|                    | BA            | 0.51                     | 0.025        | 0.52                    | 0.025       |
|                    | Rootnum_bin   | 0.28                     | 0.030        | 0.28                    | 0.030       |
|                    | Rootnum       | 0.24                     | 0.031        | 0.24                    | 0.031       |
| Disease resistance | Rust_bin      | 0.29                     | 0.032        | 0.29                    | 0.033       |
|                    | Rust_gall_vol | 0.23                     | 0.033        | 0.24                    | 0.033       |
| Wood               | StiffnessTree | 0.43                     | 0.027        | 0.43                    | 0.028       |
|                    | Lignin        | 0.17                     | 0.032        | 0.17                    | 0.032       |
|                    | Latewood%4    | 0.24                     | 0.031        | 0.25                    | 0.031       |
|                    | Density       | 0.20                     | 0.032        | 0.21                    | 0.032       |
|                    | C5C6          | 0.26                     | 0.031        | 0.27                    | 0.031       |

**Table S2 Regression Beta and standard error (SE) of the RR-BLUP model under two different cross validation schemes: 10-fold cross validation and leave one-out (L1-Out)**

| Trait Category     | Trait         | Methods        |              |               |             |
|--------------------|---------------|----------------|--------------|---------------|-------------|
|                    |               | Beta - 10-Fold | SE - 10-Fold | Beta - L1-Out | SE - L1-Out |
| Growth             | HT            | 1.18           | 0.10         | 1.12          | 0.09        |
|                    | HTLC          | 1.20           | 0.08         | 1.21          | 0.08        |
|                    | BHLC          | 1.11           | 0.07         | 1.11          | 0.07        |
|                    | DBH           | 1.19           | 0.08         | 1.17          | 0.08        |
| Development        | CWAL          | 1.04           | 0.06         | 1.03          | 0.06        |
|                    | CWAC          | 1.10           | 0.09         | 1.13          | 0.09        |
|                    | BD            | 1.23           | 0.15         | 1.19          | 0.15        |
|                    | BA            | 1.13           | 0.07         | 1.13          | 0.06        |
|                    | Rootnum_bin   | 1.36           | 0.15         | 1.31          | 0.15        |
|                    | Rootnum       | 1.51           | 0.20         | 1.48          | 0.19        |
| Disease resistance | Rust_bin      | 1.13           | 0.13         | 1.12          | 0.13        |
|                    | Rust_gall_vol | 1.29           | 0.19         | 1.23          | 0.18        |
| Wood quality       | StiffnessTree | 1.12           | 0.08         | 1.10          | 0.08        |
|                    | Lignin        | 1.00           | 0.19         | 0.96          | 0.19        |
|                    | Latewood%4    | 1.01           | 0.14         | 1.03          | 0.13        |
|                    | Density       | 1.26           | 0.20         | 1.27          | 0.20        |
|                    | C5C6          | 1.22           | 0.15         | 1.23          | 0.15        |

**Table S3** Standard error of the prediction models for the different methods tested.

| Trait Category     | Trait         | Methods |        |         |          |
|--------------------|---------------|---------|--------|---------|----------|
|                    |               | RR-BLUP | BLASSO | Bayes A | Bayes Cπ |
| Growth             | HT            | 0.029   | 0.029  | 0.029   | 0.029    |
|                    | HTLC          | 0.027   | 0.027  | 0.028   | 0.028    |
|                    | BHLC          | 0.026   | 0.026  | 0.026   | 0.026    |
|                    | DBH           | 0.027   | 0.027  | 0.027   | 0.027    |
| Development        | CWAL          | 0.029   | 0.030  | 0.030   | 0.030    |
|                    | CWAC          | 0.026   | 0.027  | 0.027   | 0.027    |
|                    | BD            | 0.032   | 0.032  | 0.032   | 0.032    |
|                    | BA            | 0.025   | 0.025  | 0.025   | 0.025    |
|                    | Rootnum_bin   | 0.030   | 0.030  | 0.031   | 0.031    |
|                    | Rootnum       | 0.031   | 0.031  | 0.031   | 0.031    |
| Disease resistance | Rust_bin      | 0.032   | 0.033  | 0.031   | 0.031    |
|                    | Rust_gall_vol | 0.033   | 0.033  | 0.033   | 0.033    |
| Wood               | StiffnessTree | 0.027   | 0.028  | 0.028   | 0.028    |
|                    | Lignin        | 0.032   | 0.032  | 0.032   | 0.032    |
|                    | Latewood%4    | 0.031   | 0.031  | 0.032   | 0.031    |
|                    | Density       | 0.032   | 0.032  | 0.032   | 0.032    |
|                    | C5C6          | 0.031   | 0.031  | 0.031   | 0.031    |

**Table S4** Accuracies of Genome Wide Selection models in 17 different traits of Loblolly Pine.  $h^2_m$  represents the Mendelian segregation and was the correction factor used to convert predictive abilities into accuracies

| Trait Category     | Trait         | $h^2_m$ | Methods |        |         |          |
|--------------------|---------------|---------|---------|--------|---------|----------|
|                    |               |         | RR-BLUP | BLASSO | Bayes A | Bayes Cπ |
| Growth             | HT            | 0.66    | 0.48    | 0.47   | 0.47    | 0.47     |
|                    | HTLC          | 0.53    | 0.62    | 0.60   | 0.60    | 0.60     |
|                    | BHLC          | 0.52    | 0.68    | 0.68   | 0.68    | 0.68     |
|                    | DBH           | 0.66    | 0.57    | 0.57   | 0.57    | 0.57     |
| Development        | CWAL          | 0.43    | 0.58    | 0.55   | 0.55    | 0.55     |
|                    | CWAC          | 0.63    | 0.60    | 0.58   | 0.59    | 0.59     |
|                    | BD            | 0.26    | 0.53    | 0.49   | 0.53    | 0.53     |
|                    | BA            | 0.5     | 0.72    | 0.72   | 0.72    | 0.72     |
|                    | Rootnum_bin   | 0.5     | 0.40    | 0.40   | 0.38    | 0.40     |
|                    | Rootnum       | 0.43    | 0.37    | 0.40   | 0.38    | 0.37     |
| Disease resistance | Rust_bin      | 0.21    | 0.63    | 0.61   | 0.74    | 0.74     |
|                    | Rust_gall_vol | 0.18    | 0.57    | 0.57   | 0.66    | 0.68     |
| Wood               | StiffnessTree | 0.37    | 0.71    | 0.64   | 0.69    | 0.69     |
|                    | Lignin        | 0.11    | 0.51    | 0.51   | 0.51    | 0.51     |
|                    | Latewood%4    | 0.17    | 0.58    | 0.58   | 0.56    | 0.58     |
|                    | Density       | 0.09    | 0.67    | 0.73   | 0.77    | 0.73     |
|                    | C5C6          | 0.14    | 0.69    | 0.67   | 0.67    | 0.67     |

**Table S5 Regression coefficients estimates of deregressed phenotypes regressed on Direct Genetic Values.**

Estimates for the model RR-BLUP are presented in the Table S2.

| Trait         | BLASSO | SE (BLASSO) | Bayes A | SE (Bayes A) | BayesCπ | SE (Bayes Cπ) |
|---------------|--------|-------------|---------|--------------|---------|---------------|
| HT            | 0.97   | 0.08        | 0.90    | 0.08         | 1.02    | 0.09          |
| HTLC          | 0.98   | 0.07        | 0.93    | 0.06         | 1.00    | 0.07          |
| BHLC          | 0.98   | 0.06        | 0.98    | 0.06         | 1.01    | 0.06          |
| DBH           | 0.99   | 0.07        | 0.97    | 0.06         | 1.02    | 0.07          |
| CWAL          | 0.90   | 0.08        | 0.87    | 0.08         | 0.95    | 0.08          |
| CWAC          | 0.91   | 0.06        | 0.91    | 0.06         | 0.99    | 0.06          |
| BD            | 0.97   | 0.13        | 0.97    | 0.12         | 1.08    | 0.13          |
| BA            | 0.96   | 0.06        | 0.99    | 0.06         | 0.99    | 0.06          |
| Rootnum_bin   | 1.01   | 0.11        | 0.85    | 0.10         | 1.04    | 0.12          |
| Rootnum       | 1.01   | 0.13        | 1.04    | 0.14         | 1.05    | 0.14          |
| Rust_bin      | 0.88   | 0.11        | 1.04    | 0.10         | 1.00    | 0.10          |
| Rust_gall_vol | 1.00   | 0.14        | 1.04    | 0.13         | 1.11    | 0.13          |
| StiffnessTree | 0.83   | 0.06        | 1.04    | 0.08         | 0.99    | 0.07          |
| Lignin        | 1.01   | 0.20        | 0.87    | 0.17         | 1.11    | 0.21          |
| Latewood%4    | 0.93   | 0.13        | 0.84    | 0.12         | 0.96    | 0.13          |
| Density       | 0.95   | 0.14        | 0.99    | 0.14         | 1.04    | 0.15          |
| C5C6          | 0.95   | 0.12        | 0.97    | 0.13         | 1.01    | 0.13          |

**Table S6 Predictive abilities of RR-BLUP B when a reduced subset of markers was used compared to the predictive abilities of RR-BLUP**

| <b>Trait</b>  | <b>RR-BLUP</b> | <b>RR-BLUP B</b> | <b>Subset length</b> |
|---------------|----------------|------------------|----------------------|
| HT            | 0.38           | 0.38             | 4630                 |
| HTLC          | 0.45           | 0.45             | 3910                 |
| BHLC          | 0.49           | 0.50             | 1380                 |
| DBH           | 0.46           | 0.46             | 3800                 |
| CWAL          | 0.38           | 0.39             | 820                  |
| CWAC          | 0.48           | 0.47             | 590                  |
| BD            | 0.27           | 0.28             | 1110                 |
| BA            | 0.51           | 0.52             | 1040                 |
| Rootnum_bin   | 0.28           | 0.28             | 2550                 |
| Rootnum       | 0.23           | 0.24             | 3350                 |
| Rust_bin      | 0.29           | 0.33             | 310                  |
| Rust_gall_vol | 0.23           | 0.37             | 100                  |
| StiffnessTree | 0.43           | 0.44             | 1300                 |
| Lignin        | 0.17           | 0.17             | 4240                 |
| Latewood%4    | 0.24           | 0.24             | 3820                 |
| Density       | 0.20           | 0.24             | 240                  |
| C5C6          | 0.25           | 0.25             | 4790                 |
