# Supplementary material
Source: PubMed Central journal article supplement (PMC3316659)
Supplement: supp_111.137026_TableS1.pdf [file supp_111.137026_TableS1.pdf]

**Table S1 Predictive ability ( $r_{\hat{y}y}$ ) and standard error (SE) of RR-BLUP model under two different cross validation schemes: 10-fold cross validation and leave one-out (L1-Out)**

| Trait Category     | Trait         | Methods                  |              |                         |             |
|--------------------|---------------|--------------------------|--------------|-------------------------|-------------|
|                    |               | $r_{\hat{y}y}$ - 10-Fold | SE - 10-Fold | $r_{\hat{y}y}$ - L1-Out | SE - L1-Out |
| Growth             | HT            | 0.39                     | 0.029        | 0.38                    | 0.029       |
|                    | HTLC          | 0.45                     | 0.027        | 0.46                    | 0.027       |
|                    | BHLC          | 0.49                     | 0.026        | 0.49                    | 0.026       |
|                    | DBH           | 0.46                     | 0.027        | 0.46                    | 0.027       |
| Development        | CWAL          | 0.48                     | 0.029        | 0.48                    | 0.030       |
|                    | CWAC          | 0.38                     | 0.026        | 0.40                    | 0.027       |
|                    | BD            | 0.27                     | 0.032        | 0.27                    | 0.032       |
|                    | BA            | 0.51                     | 0.025        | 0.52                    | 0.025       |
|                    | Rootnum_bin   | 0.28                     | 0.030        | 0.28                    | 0.030       |
|                    | Rootnum       | 0.24                     | 0.031        | 0.24                    | 0.031       |
| Disease resistance | Rust_bin      | 0.29                     | 0.032        | 0.29                    | 0.033       |
|                    | Rust_gall_vol | 0.23                     | 0.033        | 0.24                    | 0.033       |
| Wood               | StiffnessTree | 0.43                     | 0.027        | 0.43                    | 0.028       |
|                    | Lignin        | 0.17                     | 0.032        | 0.17                    | 0.032       |
|                    | Latewood%4    | 0.24                     | 0.031        | 0.25                    | 0.031       |
|                    | Density       | 0.20                     | 0.032        | 0.21                    | 0.032       |
|                    | C5C6          | 0.26                     | 0.031        | 0.27                    | 0.031       |
