# Supplementary material
Source: PubMed Central journal article supplement (PMC3316659)
Supplement: supp_111.137026_TableS2.pdf [file supp_111.137026_TableS2.pdf]

**Table S2 Regression Beta and standard error (SE) of the RR-BLUP model under two different cross validation schemes: 10-fold cross validation and leave one-out (L1-Out)**

| Trait Category     | Trait         | Methods        |              |               |             |
|--------------------|---------------|----------------|--------------|---------------|-------------|
|                    |               | Beta - 10-Fold | SE - 10-Fold | Beta - L1-Out | SE - L1-Out |
| Growth             | HT            | 1.18           | 0.10         | 1.12          | 0.09        |
|                    | HTLC          | 1.20           | 0.08         | 1.21          | 0.08        |
|                    | BHLC          | 1.11           | 0.07         | 1.11          | 0.07        |
|                    | DBH           | 1.19           | 0.08         | 1.17          | 0.08        |
| Development        | CWAL          | 1.04           | 0.06         | 1.03          | 0.06        |
|                    | CWAC          | 1.10           | 0.09         | 1.13          | 0.09        |
|                    | BD            | 1.23           | 0.15         | 1.19          | 0.15        |
|                    | BA            | 1.13           | 0.07         | 1.13          | 0.06        |
|                    | Rootnum_bin   | 1.36           | 0.15         | 1.31          | 0.15        |
|                    | Rootnum       | 1.51           | 0.20         | 1.48          | 0.19        |
| Disease resistance | Rust_bin      | 1.13           | 0.13         | 1.12          | 0.13        |
|                    | Rust_gall_vol | 1.29           | 0.19         | 1.23          | 0.18        |
| Wood quality       | StiffnessTree | 1.12           | 0.08         | 1.10          | 0.08        |
|                    | Lignin        | 1.00           | 0.19         | 0.96          | 0.19        |
|                    | Latewood%4    | 1.01           | 0.14         | 1.03          | 0.13        |
|                    | Density       | 1.26           | 0.20         | 1.27          | 0.20        |
|                    | C5C6          | 1.22           | 0.15         | 1.23          | 0.15        |
