# Supplementary material
Source: PubMed Central journal article supplement (PMC3316659)
Supplement: supp_111.137026_TableS3.pdf [file supp_111.137026_TableS3.pdf]

**Table S3** Standard error of the prediction models for the different methods tested.

| Trait Category     | Trait         | Methods |        |         |          |
|--------------------|---------------|---------|--------|---------|----------|
|                    |               | RR-BLUP | BLASSO | Bayes A | Bayes Cπ |
| Growth             | HT            | 0.029   | 0.029  | 0.029   | 0.029    |
|                    | HTLC          | 0.027   | 0.027  | 0.028   | 0.028    |
|                    | BHLC          | 0.026   | 0.026  | 0.026   | 0.026    |
|                    | DBH           | 0.027   | 0.027  | 0.027   | 0.027    |
| Development        | CWAL          | 0.029   | 0.030  | 0.030   | 0.030    |
|                    | CWAC          | 0.026   | 0.027  | 0.027   | 0.027    |
|                    | BD            | 0.032   | 0.032  | 0.032   | 0.032    |
|                    | BA            | 0.025   | 0.025  | 0.025   | 0.025    |
|                    | Rootnum_bin   | 0.030   | 0.030  | 0.031   | 0.031    |
|                    | Rootnum       | 0.031   | 0.031  | 0.031   | 0.031    |
| Disease resistance | Rust_bin      | 0.032   | 0.033  | 0.031   | 0.031    |
|                    | Rust_gall_vol | 0.033   | 0.033  | 0.033   | 0.033    |
| Wood               | StiffnessTree | 0.027   | 0.028  | 0.028   | 0.028    |
|                    | Lignin        | 0.032   | 0.032  | 0.032   | 0.032    |
|                    | Latewood%4    | 0.031   | 0.031  | 0.032   | 0.031    |
|                    | Density       | 0.032   | 0.032  | 0.032   | 0.032    |
|                    | C5C6          | 0.031   | 0.031  | 0.031   | 0.031    |
