# Supplementary material
Source: PubMed Central journal article supplement (PMC3316659)
Supplement: supp_111.137026_TableS4.pdf [file supp_111.137026_TableS4.pdf]

**Table S4** Accuracies of Genome Wide Selection models in 17 different traits of Loblolly Pine.  $h^2_m$  represents the Mendelian segregation and was the correction factor used to convert predictive abilities into accuracies

| Trait Category     | Trait         | $h^2_m$ | Methods |        |         |          |
|--------------------|---------------|---------|---------|--------|---------|----------|
|                    |               |         | RR-BLUP | BLASSO | Bayes A | Bayes Cπ |
| Growth             | HT            | 0.66    | 0.48    | 0.47   | 0.47    | 0.47     |
|                    | HTLC          | 0.53    | 0.62    | 0.60   | 0.60    | 0.60     |
|                    | BHLC          | 0.52    | 0.68    | 0.68   | 0.68    | 0.68     |
|                    | DBH           | 0.66    | 0.57    | 0.57   | 0.57    | 0.57     |
| Development        | CWAL          | 0.43    | 0.58    | 0.55   | 0.55    | 0.55     |
|                    | CWAC          | 0.63    | 0.60    | 0.58   | 0.59    | 0.59     |
|                    | BD            | 0.26    | 0.53    | 0.49   | 0.53    | 0.53     |
|                    | BA            | 0.5     | 0.72    | 0.72   | 0.72    | 0.72     |
|                    | Rootnum_bin   | 0.5     | 0.40    | 0.40   | 0.38    | 0.40     |
|                    | Rootnum       | 0.43    | 0.37    | 0.40   | 0.38    | 0.37     |
| Disease resistance | Rust_bin      | 0.21    | 0.63    | 0.61   | 0.74    | 0.74     |
|                    | Rust_gall_vol | 0.18    | 0.57    | 0.57   | 0.66    | 0.68     |
| Wood               | StiffnessTree | 0.37    | 0.71    | 0.64   | 0.69    | 0.69     |
|                    | Lignin        | 0.11    | 0.51    | 0.51   | 0.51    | 0.51     |
|                    | Latewood%4    | 0.17    | 0.58    | 0.58   | 0.56    | 0.58     |
|                    | Density       | 0.09    | 0.67    | 0.73   | 0.77    | 0.73     |
|                    | C5C6          | 0.14    | 0.69    | 0.67   | 0.67    | 0.67     |
