# Supplementary material
Source: PubMed Central journal article supplement (PMC3316659)
Supplement: supp_111.137026_TableS5.pdf [file supp_111.137026_TableS5.pdf]

**Table S5 Regression coefficients estimates of deregressed phenotypes regressed on Direct Genetic Values.**

Estimates for the model RR-BLUP are presented in the Table S2.

| Trait         | BLASSO | SE (BLASSO) | Bayes A | SE (Bayes A) | BayesCπ | SE (Bayes Cπ) |
|---------------|--------|-------------|---------|--------------|---------|---------------|
| HT            | 0.97   | 0.08        | 0.90    | 0.08         | 1.02    | 0.09          |
| HTLC          | 0.98   | 0.07        | 0.93    | 0.06         | 1.00    | 0.07          |
| BHLC          | 0.98   | 0.06        | 0.98    | 0.06         | 1.01    | 0.06          |
| DBH           | 0.99   | 0.07        | 0.97    | 0.06         | 1.02    | 0.07          |
| CWAL          | 0.90   | 0.08        | 0.87    | 0.08         | 0.95    | 0.08          |
| CWAC          | 0.91   | 0.06        | 0.91    | 0.06         | 0.99    | 0.06          |
| BD            | 0.97   | 0.13        | 0.97    | 0.12         | 1.08    | 0.13          |
| BA            | 0.96   | 0.06        | 0.99    | 0.06         | 0.99    | 0.06          |
| Rootnum_bin   | 1.01   | 0.11        | 0.85    | 0.10         | 1.04    | 0.12          |
| Rootnum       | 1.01   | 0.13        | 1.04    | 0.14         | 1.05    | 0.14          |
| Rust_bin      | 0.88   | 0.11        | 1.04    | 0.10         | 1.00    | 0.10          |
| Rust_gall_vol | 1.00   | 0.14        | 1.04    | 0.13         | 1.11    | 0.13          |
| StiffnessTree | 0.83   | 0.06        | 1.04    | 0.08         | 0.99    | 0.07          |
| Lignin        | 1.01   | 0.20        | 0.87    | 0.17         | 1.11    | 0.21          |
| Latewood%4    | 0.93   | 0.13        | 0.84    | 0.12         | 0.96    | 0.13          |
| Density       | 0.95   | 0.14        | 0.99    | 0.14         | 1.04    | 0.15          |
| C5C6          | 0.95   | 0.12        | 0.97    | 0.13         | 1.01    | 0.13          |
