# Supplementary material
Source: PubMed Central journal article supplement (PMC3316659)
Supplement: supp_111.137026_TableS6.pdf [file supp_111.137026_TableS6.pdf]

**Table S6 Predictive abilities of RR-BLUP B when a reduced subset of markers was used compared to the predictive abilities of RR-BLUP**

| <b>Trait</b>  | <b>RR-BLUP</b> | <b>RR-BLUP B</b> | <b>Subset length</b> |
|---------------|----------------|------------------|----------------------|
| HT            | 0.38           | 0.38             | 4630                 |
| HTLC          | 0.45           | 0.45             | 3910                 |
| BHLC          | 0.49           | 0.50             | 1380                 |
| DBH           | 0.46           | 0.46             | 3800                 |
| CWAL          | 0.38           | 0.39             | 820                  |
| CWAC          | 0.48           | 0.47             | 590                  |
| BD            | 0.27           | 0.28             | 1110                 |
| BA            | 0.51           | 0.52             | 1040                 |
| Rootnum_bin   | 0.28           | 0.28             | 2550                 |
| Rootnum       | 0.23           | 0.24             | 3350                 |
| Rust_bin      | 0.29           | 0.33             | 310                  |
| Rust_gall_vol | 0.23           | 0.37             | 100                  |
| StiffnessTree | 0.43           | 0.44             | 1300                 |
| Lignin        | 0.17           | 0.17             | 4240                 |
| Latewood%4    | 0.24           | 0.24             | 3820                 |
| Density       | 0.20           | 0.24             | 240                  |
| C5C6          | 0.25           | 0.25             | 4790                 |
